# Supplementary material for: Nitrogen- and sulfur-enriched porous carbon from waste watermelon seeds for high-energy, high-temperature green ultracapacitors
Source: Royal Society of Chemistry journal article supplement (doi:10.1039/c8ta05248d), 2018-01-01
Supplement: c8ta05248d1.pdf [file c8ta05248d1.pdf]

**Supporting information**

**Nitrogen- and Sulfur-Enriched Porous Carbon from Waste Watermelon  
Seeds for High-Energy, High-Temperature Green Ultracapacitors**

*Ranjith Thangavel<sup>a</sup>, Aravindaraj Govindaraj Kannan<sup>b</sup>, Rubha Ponraj<sup>b</sup>, Vigneysh Thangavel<sup>c</sup>,*

*Dong-Won Kim<sup>b</sup>, and Yun-Sung Lee<sup>a,\*</sup>*

*<sup>a</sup> Faculty of Applied Chemical Engineering, Chonnam National University, Gwang-ju 500-757,  
Republic of Korea.*

*<sup>b</sup> Department of Chemical Engineering, Hanyang University, Seoul 04763, Republic of Korea.*

*<sup>c</sup> School of Electrical and Electronics Engineering, SASTRA University, Thanjavur, India*

E-mail address: [leeys@chonnam.ac.kr](mailto:leeys@chonnam.ac.kr) (Y.S. Lee)

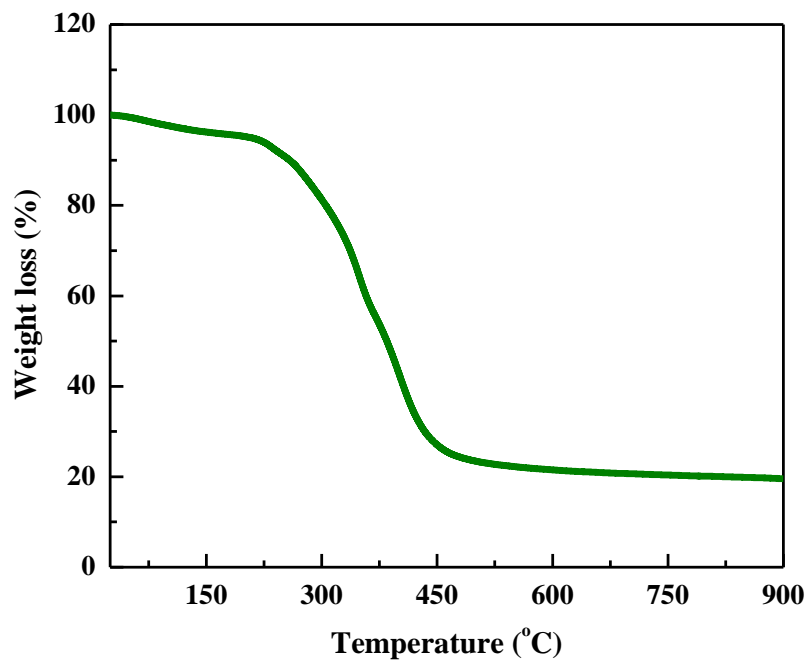

**Fig. S1** TGA curve of dried watermelon seed

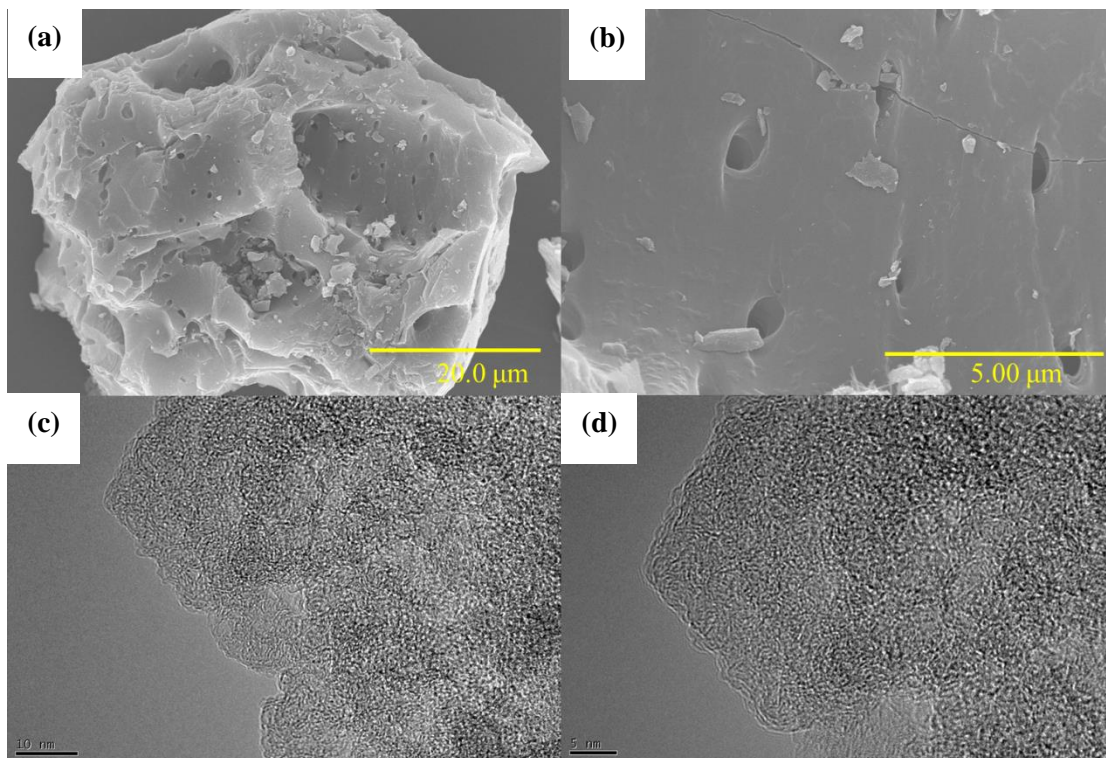

**Fig. S2** (a)-(b) FE-SEM images of NS-WDC, and (c)-(d) TEM images of WDC

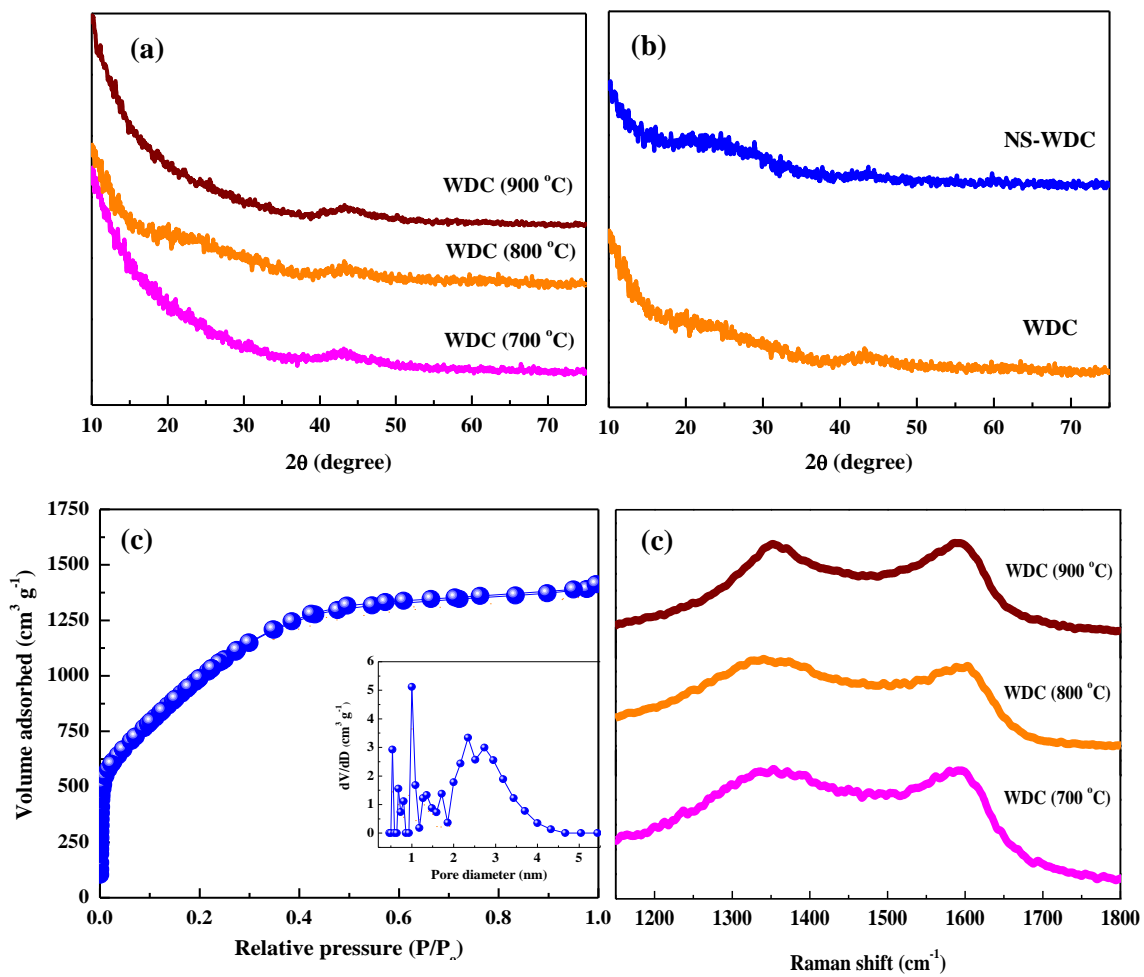

**Fig. S3** (a) XRD patterns of WDC obtained at different temperatures, (b) XRD patterns of WDC (800 °C) and NS-WDC, (c)  $N_2$  adsorption desorption isotherm of NS-WDC, and (d) Raman spectrum of WDC obtained at different temperatures,

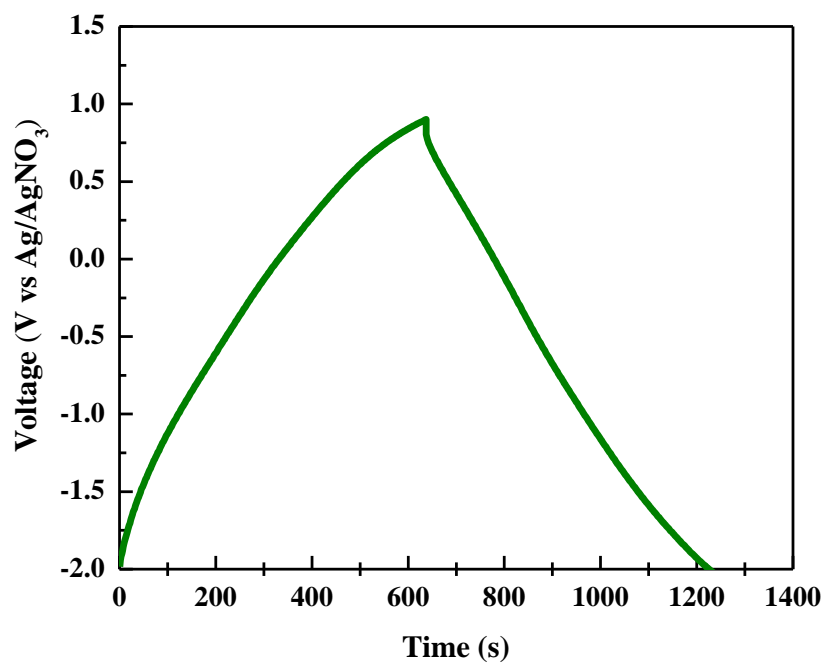

**Fig. S4** CD curve of WDC in three electrode configuration at  $1 \text{ A g}^{-1}$ .

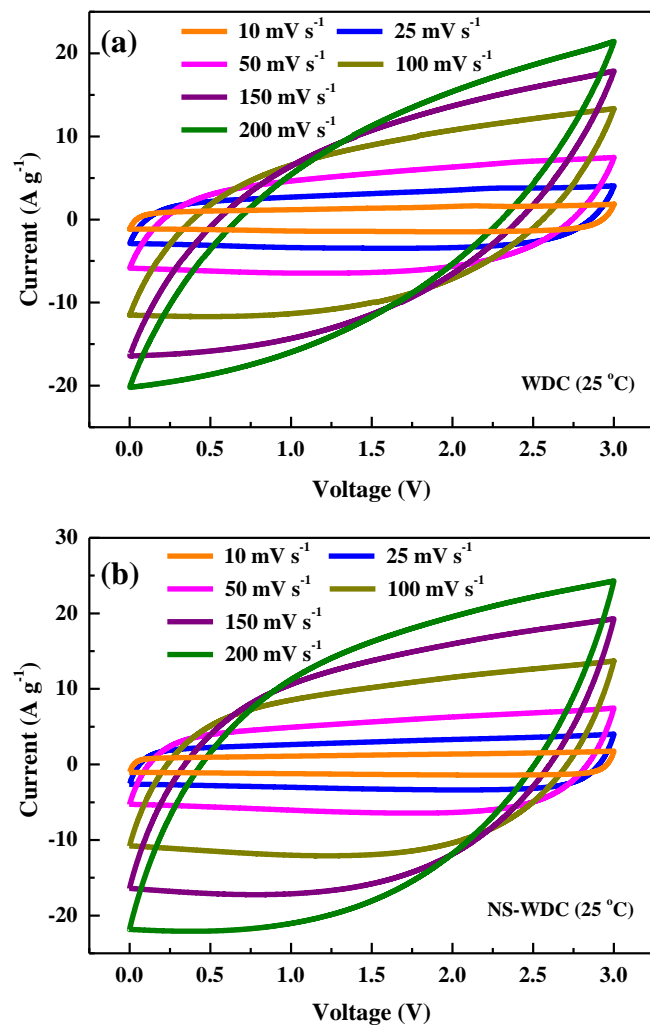

**Fig. S5** (a) CV traces of WDCs, (b) CV traces of NS-WDCs

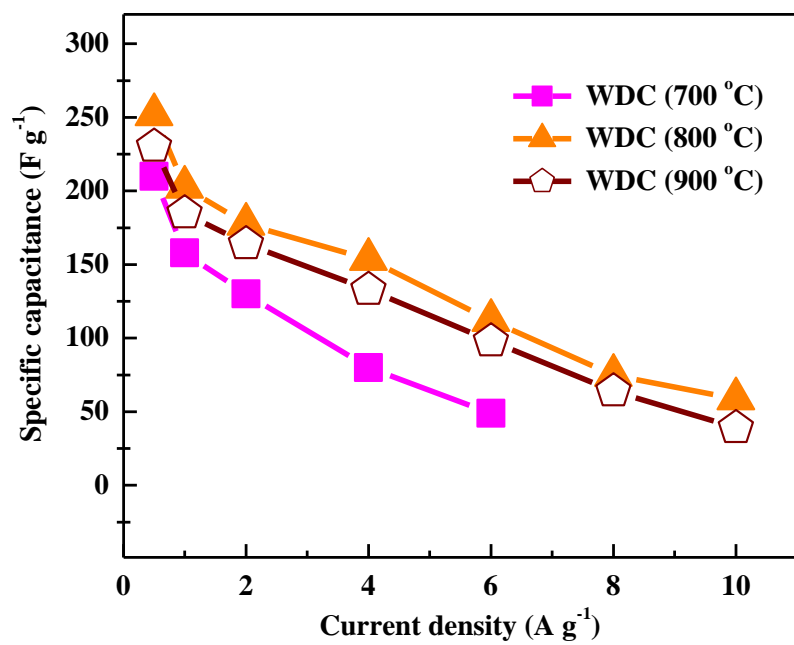

Fig. S6 Rate performance WDCs synthesized at different temperatures

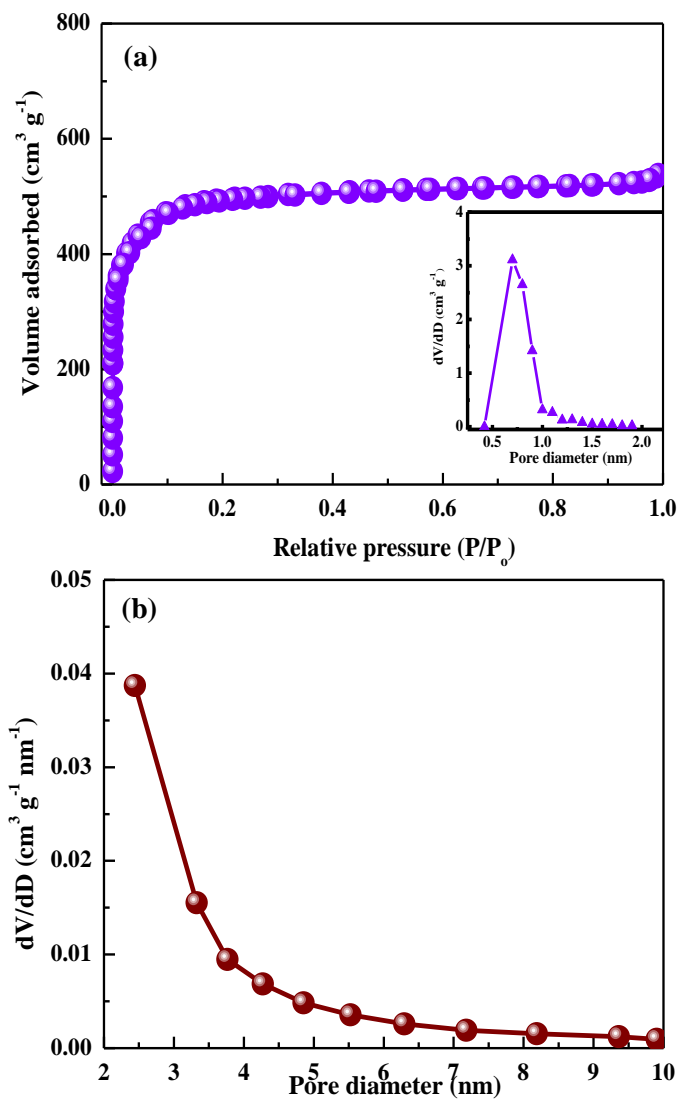

**Fig. S8** (a)  $N_2$  adsorption/desorption isotherm of CAC, Inset: Micro Pore size distribution, and  
(b) BJH pore size distribution



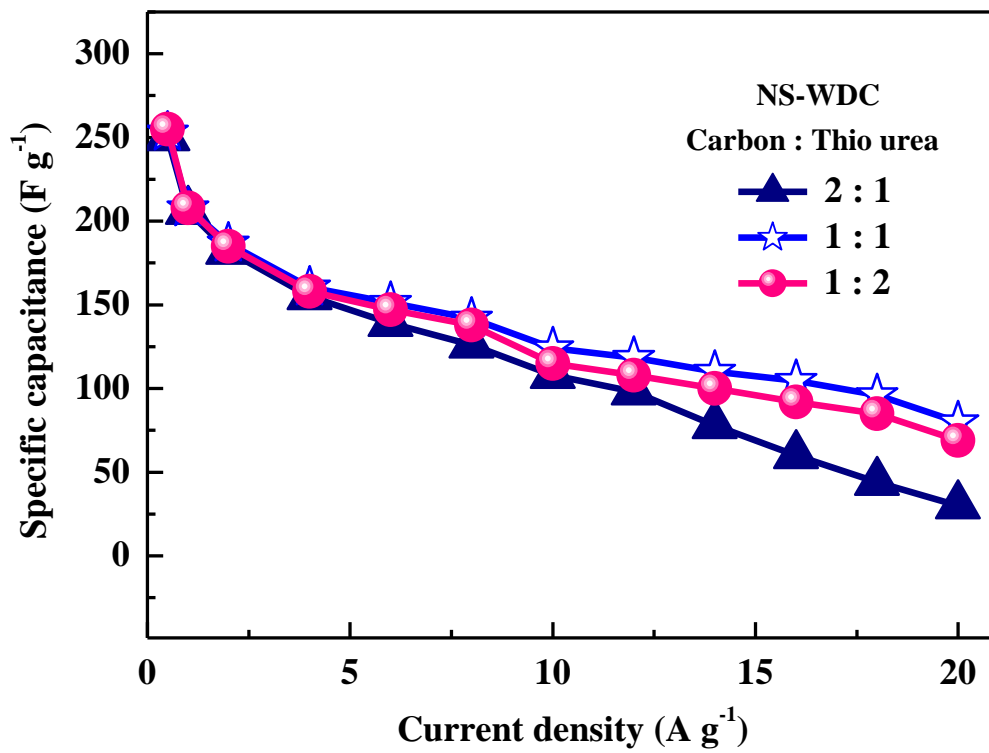

**Fig. S8** Effect of porous carbon to thio urea ratio on specific capacitance

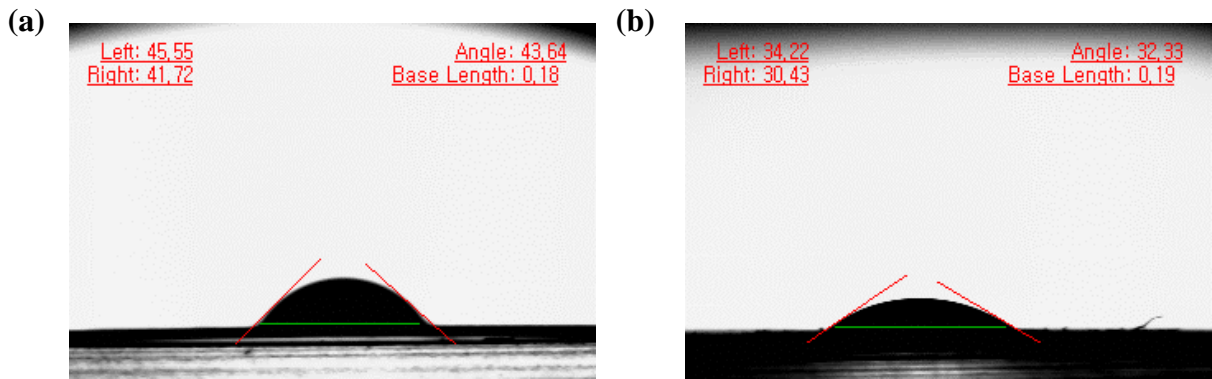

**Fig. S9** Contact angle measurements with  $\text{NaClO}_4$  in EC:DMC

(a) WDC, and (b) NS-WDC electrodes

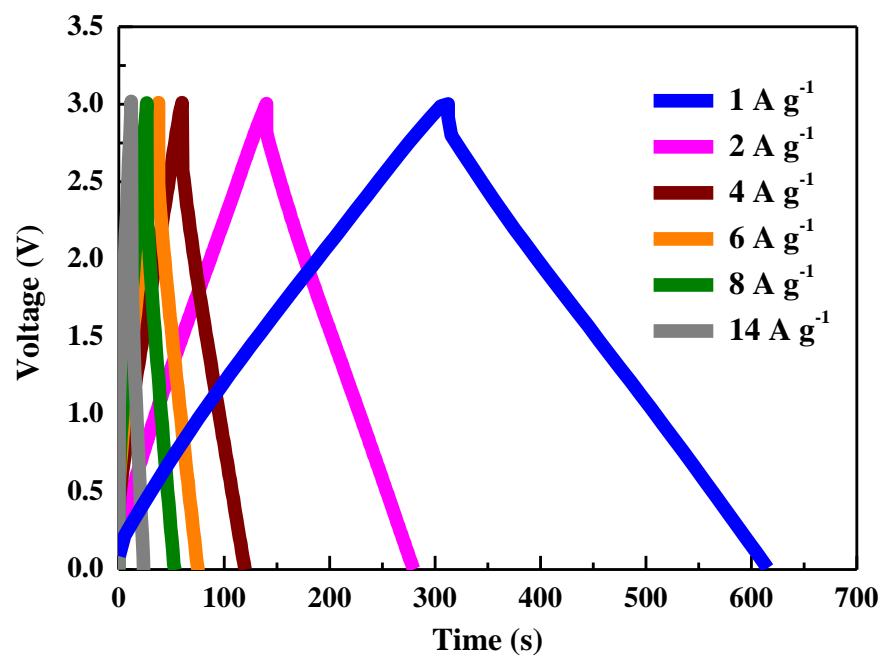

**Fig. S10** CD curves of NS-WDC at 55 °C

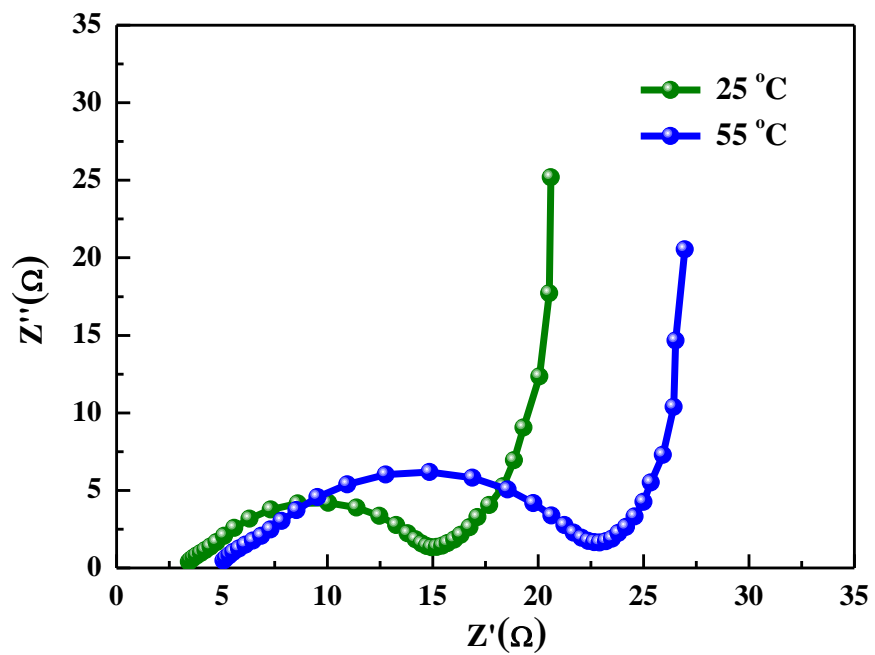

**Fig. S12** Nyquist plots of NS-WDC at 25 °C, and 55 °C

| <b>Sample</b> | <b>Elemental analysis</b> |            |            |            |            |
|---------------|---------------------------|------------|------------|------------|------------|
|               | C<br>(wt%)                | O<br>(wt%) | N<br>(wt%) | H<br>(wt%) | S<br>(wt%) |
| WDC           | 82.9                      | 13.11      | 1.85       | 0.24       | 0.07       |
| NS-WDC        | 81.1                      | 10.01      | 3.59       | 0.28       | 3.31       |

**Table S1.** Bulk composition of WDC and NS-WDC by elemental analysis

| <b>Sample</b> | <b>XPS Analysis</b> |            |            |            |
|---------------|---------------------|------------|------------|------------|
|               | C<br>(wt%)          | O<br>(wt%) | N<br>(wt%) | S<br>(wt%) |
| WDC           | 81.43               | 15.66      | 2.9        | 0.11       |
| NS-WDC        | 80.49               | 12.07      | 4.13       | 3.31       |

**Table S2.** Surface composition of WDC and NS-WDC by XPS

| <b>Carbon :<br/>Thio urea</b> | <b>Elemental analysis (NS-WDC)</b> |                    |                    |                    |                    |
|-------------------------------|------------------------------------|--------------------|--------------------|--------------------|--------------------|
|                               | <b>C<br/>(wt%)</b>                 | <b>O<br/>(wt%)</b> | <b>N<br/>(wt%)</b> | <b>H<br/>(wt%)</b> | <b>S<br/>(wt%)</b> |
| 1 : 0.5                       | 82.1                               | 11.42              | 2.89               | 0.25               | 1.65               |
| 1 : 1                         | 81.1                               | 10.01              | 3.59               | 0.28               | 3.31               |
| 1 : 2                         | 81.0                               | 9.89               | 4.46               | 0.26               | 2.39               |

**Table S3.** Bulk elemental composition of NS-WDC synthesized under different carbon : thio urea ratio
